# Supplementary material
Source: PubMed Central journal article supplement (PMC2230844)

**SUPPLEMENTAL INFORMATION****SUPPLEMENTAL RESULTS****CEP55 Interactions are Not Required for HIV-1 Budding**

As CEP55 bound both TSG101 and ALIX, the two known cellular Gag binding partners involved in HIV-1 budding, we tested whether CEP55 was required for HIV-1 release and infectivity. siRNA depletion of CEP55 inhibited cell growth (Sakai et al., 2006), and viral Gag protein expression (not shown), which prohibited us from meaningfully testing the effects of CEP55 depletion on virus budding. We therefore instead tested whether TSG101 and ALIX mutations that abrogated CEP55 binding also inhibited HIV-1 release and infectivity.

As shown in Fig. S4A, a mutant siRNA-resistant TSG101 protein that lacked CEP55 binding activity (TSG101<sub>154-164A</sub>) rescued HIV-1 infectivity to nearly the same extent as wild type TSG101 in cells depleted of endogenous TSG101 (compare lanes 1-3). The TSG101<sub>154-164A</sub> mutant also rescued other defects characteristic of inhibited virus budding, including virion release (upper right panel, compare lanes 1 and 3) and the delayed Gag processing that led to cellular accumulation of p25<sup>Gag</sup> and p41<sup>Gag</sup> cleavage intermediates (middle panel). As expected, the wild type TSG101 protein also rescued all of these budding defects, whereas a control mutant TSG101 protein that lacked PTAP binding activity (TSG101<sub>M95A</sub>) did not.

Analogous experiments demonstrated that a mutant ALIX protein that lacked CEP55 binding activity (ALIX<sub>800-802A</sub>) also supported HIV-1 budding. These experiments employed a mutant HIV-1 construct that lacked the ability to recruit TSG101 (HIV-1<sub>ΔPTAP</sub>) and therefore required ALIX protein overexpression for release and infectivity (Fisher et al., 2007; Usami et al., 2007). As shown in Fig. S4B, HIV-1<sub>ΔPTAP</sub> release and infectivity were strongly stimulated by overexpression of ALIX<sub>800-802A</sub> (21-fold increase in infectivity), to levels that were nearly the

same as those seen for overexpression of wild type ALIX (24-fold increase). We therefore conclude that CEP55 interactions with TSG101/ESCRT-I and ALIX are not required for HIV-1 budding and infectivity, arguing against a role for CEP55 in virus release.

**SUPPLEMENTAL REFERENCES**

- Fisher, R.D., Chung, H.Y., Zhai, Q., Robinson, H., Sundquist, W.I. and Hill, C.P. (2007) Structural and Biochemical Studies of ALIX/AIP1 and Its Role in Retrovirus Budding. *Cell*, **128**, 841-852.
- Garrus, J.E., von Schwedler, U.K., Pornillos, O.W., Morham, S.G., Zavitz, K.H., Wang, H.E., Wettstein, D.A., Stray, K.M., Cote, M., Rich, R.L., Myszka, D.G. and Sundquist, W.I. (2001) Tsg101 and the vacuolar protein sorting pathway are essential for HIV-1 budding. *Cell*, **107**, 55-65.
- Onishi, M., Kinoshita, S., Morikawa, Y., Shibuya, A., Phillips, J., Lanier, L.L., Gorman, D.M., Nolan, G.P., Miyajima, A. and Kitamura, T. (1996) Applications of retrovirus-mediated expression cloning. *Exp Hematol*, **24**, 324-329.
- Sakai, M., Shimokawa, T., Kobayashi, T., Matsushima, S., Yamada, Y., Nakamura, Y. and Furukawa, Y. (2006) Elevated expression of C10orf3 (chromosome 10 open reading frame 3) is involved in the growth of human colon tumor. *Oncogene*, **25**, 480-486.
- Usami, Y., Popov, S. and Gottlinger, H.G. (2007) Potent Rescue of Human Immunodeficiency Virus Type 1 Late Domain Mutants by ALIX/AIP1 Depends on Its CHMP4 Binding Site. *J Virol*, **81**, 6614-6622.
- Welsch, S., Habermann, A., Jager, S., Muller, B., Krijnse-Locker, J. and Krausslich, H.G. (2006) Ultrastructural analysis of ESCRT proteins suggests a role for endosome-associated tubular-vesicular membranes in ESCRT function. *Traffic*, **7**, 1551-1566.

## SUPPLEMENTAL TABLES

Table S1. Summary of Two Hybrid Screening Interactions

| Bait          | Prey          | Occurrences | Implied Binding Sites                |
|---------------|---------------|-------------|--------------------------------------|
| <b>TSG101</b> | <b>CEP55</b>  |             |                                      |
| 50-390        | 73-419        |             |                                      |
| 50-390        | 77-309        |             |                                      |
| 50-390        | 151-286       |             |                                      |
| 140-270       | 64-289        | 11          | TSG101 (140-270), CEP55 (151-243)    |
| 140-270       | 66-243        |             |                                      |
| 140-270       | 77-309        |             |                                      |
| 140-270       | 96-301        |             |                                      |
| 140-270       | 151-186       |             |                                      |
| <b>ALIX</b>   | <b>CEP55</b>  |             |                                      |
| 601-868       | 77-206        | 13          | ALIX (601-886), CEP55 (77-206)       |
| 601-868       | 77-302        |             |                                      |
| 601-868       | 77-309        |             |                                      |
| <b>TSG101</b> | <b>IQGAP1</b> |             |                                      |
| 240-390       | 1299-1555     |             |                                      |
| 240-390       | 1308-1606     |             |                                      |
| 240-390       | 1392-1657     |             |                                      |
| 240-390       | 1403-1554     |             |                                      |
| 240-390       | 1404-1553     | 18          | TSG101 (240-390), IQGAP1 (1463-1547) |
| 240-390       | 1406-1547     |             |                                      |
| 240-390       | 1408-1605     |             |                                      |
| 240-390       | 1413-1567     |             |                                      |
| 240-390       | 1419-1657     |             |                                      |
| 240-390       | 1439-1565     |             |                                      |
| 240-390       | 1439-1567     |             |                                      |
| 240-390       | 1463-1568     |             |                                      |
| <b>TSG101</b> | <b>ROCK1</b>  |             |                                      |
| 231-390       | 462-617       | 2           | TSG101 (231-390), ROCK1 (462-617)    |

**Table S2. Mammalian Expression Vectors**

| Plasmid Name             | Internal ID | Backbone           | Cloning Sites | Epitope Tags     | Source                |
|--------------------------|-------------|--------------------|---------------|------------------|-----------------------|
| pCAG.Myc                 | WISP06-64   |                    |               | N,Myc            | [1]                   |
| pCAG.OSF                 | WISP06-65   | pCAG.Myc           |               | N,One-StrEP-FLAG | [2]                   |
| pEF.FLAG                 | WISP07-59   | pEF4/Myc-His A     |               | N,FLAG           | Invitrogen            |
| pcDNA.Myc.His.A(-)       | WISP02-257  |                    |               | C,Myc- HIS       | Invitrogen            |
| pcDNA.FOS                | WISP07-19   | pcDNA.Myc.His.A(-) |               | C,FLAG-One-StrEP | Invitrogen            |
| pCI.FLAG.NdeBam          | WISP02-31   | pCI-neo            |               | N,FLAG           | Promega               |
| pEGFP-C1                 | WISP98-114  |                    |               | N,GFP            | BD Bioscience         |
| pMIH                     | WISP07-125  | pMX-IRES-GFP       |               |                  | gift from Dr.Sugamura |
| pGag-Pol                 | WISP07-127  |                    |               |                  | gift from Dr.Sugamura |
| pMD.G                    | WISP03-279  |                    |               |                  | gift from Dr.Trono    |
| pEF.FLAG.ALIX            | WISP07-20   | pEF.FLAG           | EcoRI, BamHI  | N,FLAG           | BC020066 [3]          |
| pEF.FLAG.ALIX.794-796A   | WISP07-21   | pEF.FLAG           | EcoRI, BamHI  | N,FLAG           | BC020066 [3]          |
| pEF.FLAG.ALIX.800-802A   | WISP07-22   | pEF.FLAG           | EcoRI, BamHI  | N,FLAG           | BC020066 [3]          |
| pcDNA.ALIX.MycHIS        | WISP03-344  | pcDNA.myc.His.A(-) | EcoRI, BamHI  | C,Myc-HIS        | [4]                   |
| pEGFP.ALIX               | WISP07-23   | pEGFP.C1           | EcoRI, BamHI  | N,GFP            | BC020066 [3]          |
| pCI.FLAG.ALIX            | WISP03-345  | pCI.FLAG.NdeBam    | NdeI, BamHI   | N,FLAG           | [5]                   |
| pCI.FLAG.ALIX.I212D      | WISP05-117  | pCI.FLAG.NdeBam    | NdeI, BamHI   | N,FLAG           | [5]                   |
| pCI.FLAG.ALIX.F676D      | WISP06-164  | pCI.FLAG.NdeBam    | NdeI, BamHI   | N,FLAG           | [5]                   |
| pCI.FLAG.ALIX.800-802A   | WISP07-24   | pCI.FLAG.NdeBam    | NdeI, BamHI   | N,FLAG           | [5]                   |
| pCI.FLAG.ALIX.744,745A   | WISP07-71   | pCI.FLAG.NdeBam    | NdeI, BamHI   | N,FLAG           | [5]                   |
| pcDNA.CEP55.mycHIS       | WISP07-25   | pcDNA.myc.His.A(-) | XbaI, EcoRI   | C, Myc-HIS       | BC008947 [3]          |
| pcDNA.CEP55.FOS          | WISP07-26   | pcDNA.FOS          | XbaI, EcoRI   | C,FLAG-One-StrEP | BC008947 [3]          |
| pCAG.OSF.CEP55           | WISP07-27   | pCAG.OSF           | KpnI, XhoI    | N,One-StrEP-FLAG | BC008947 [3]          |
| pCAG.OSF.TSG101          | WISP06-67   | pCAG.OSF           | KpnI, XhoI    | N,One-StrEP-FLAG | [2]                   |
| pCAG.Myc.TSG101          | WISP06-66   | pCAG.Myc           | KpnI, XhoI    | N,Myc            | [2]                   |
| pCAG.Myc.TSG101.154-164A | WISP07-28   | pCAG.Myc           | KpnI, XhoI    | N,Myc            | HeLa cDNA             |
| pcDNA.GFP.TSG101         | WISP02-22   | pcDNA              | KpnI, BamHI   | N,GFP            | Myriad Genetics       |
| pCAG.NT.VPS28            | WISP06-70   | pCAG               | (KpnI), XhoI  | none             | [2]                   |
| pCAG.Myc.VPS28           | WISP06-71   | pCAG.Myc           | KpnI, XhoI    | N,Myc            | [2]                   |
| pCAG.NT.VPS37B           | WISP06-76   | pCAG               | (KpnI), XhoI  | none             | [2]                   |
| pCAG.Myc.VPS37B          | WISP06-77   | pCAG.Myc           | KpnI, XhoI    | N,Myc            | [2]                   |
| pCAG.Myc.VPS37C          | WISP06-82   | pCAG.Myc           | KpnI, XhoI    | N,Myc            | [2]                   |
| pcDNA.NT.EI4A (MVB12A)   | WISP06-87   | pcDNA.myc.His.A(-) | XbaI, EcoRI   | none             | [2]                   |
| pCAG.Myc.EI4A. (MVB12A)  | WISP06-88   | pCAG.Myc           | KpnI, XhoI    | N,Myc            | [2]                   |
| pcDNA.CHMP2A.FLAG        | WISP02-337  | pcDNA.myc.His.A(-) | EcoRI, BamHI  | C,FLAG           | [6]                   |
| pcDNA.CHMP4B.FLAG        | WISP02-338  | pcDNA.myc.His.A(-) | EcoRI, BamHI  | C,FLAG           | [6]                   |
| pcDNA.CHMP5.FLAG         | WISP02-339  | pcDNA.myc.His.A(-) | EcoRI, BamHI  | C,FLAG           | [6]                   |
| pCAG.OSF.CHMP6           | WISP07-29   | pCAG.OSF           | KpnI, XhoI    | N,One-StrEP-FLAG | BC010108 [3]          |
| pCAG.Myc.ROCK1           | WISP07-30   | pCAG.Myc           | KpnI, XhoI    | N,Myc            | [7]                   |
| pCAG.Myc.CD2AP           | WISP07-31   | pCAG.Myc           | KpnI, XhoI    | N,Myc            | AF164377 [3]          |
| pCAG.OSF.CD2AP           | WISP07-32   | pCAG.OSF           | KpnI, XhoI    | N,One-StrEP-FLAG | AF164377 [3]          |
| pEGFP.VPS4A.WT           | WISP01-111  | pEGFP-C1           | EcoRI, BamHI  | N,GFP            | [4]                   |
| pEGFP.VPS4A.K173Q        | WISP01-112  | pEGFP-C1           | EcoRI, BamHI  | N,GFP            | [4]                   |
| pMIH.FLAG.ALIX           | WISP07-126  | pMIH               | BamHI, EcoRI  | N,FLAG           | BC020066 [3]          |

[1] Madaule P, Eda M, Watanabe N, Fujisawa K, Matsuoka T, Bito H, Ishizaki T, Narumiya S. (1998) Role of citron kinase as a target of the small GTPase Rho in cytokinesis. *Nature*. 394:491-494.

[2] Morita E, Sandrin V, Alam SL, Eckert DM, Gygi SP, Sundquist WI. (2007) Identification of the human MVB12 proteins as ESCRT-I subunits that function in HIV budding. *Cell Host & Microbe* 2: 41-53.

[3] EST clone number from ATCC.

[4] von Schwedler UK, Stuchell M, Muller B, Ward DM, Chung HY, Morita E, Wang HE, Davis T, He GP, Cimbora DM, Scott A, Krausslich HG, Kaplan J, Morham SG, Sundquist WI. (2003) The protein network of HIV budding. *Cell*. 114:701-713.

[5] Fisher RD, Chung HY, Zhai Q, Robinson H, Sundquist WI, Hill CP. (2007) Structural and biochemical studies of ALIX/AIP1 and its role in retrovirus budding. *Cell*. 128: 841-852.

[6] Ward DM, Vaughn MB, Shiflett SL, White PL, Pollock AL, Hill J, Schnegelberger R, Sundquist WI, Kaplan J. (2005) The role of LIP5 and CHMP5 in multivesicular body formation and HIV-1 budding in mammalian cells. *J Biol Chem*. 280:10548-10555.

[7] Ishizaki T, Naito M, Fujisawa K, Maekawa M, Watanabe N, Saito Y, Narumiya S. (1997) p160ROCK, a Rho-associated coiled-coil forming protein kinase, works downstream of Rho and induces focal adhesions. *FEBS Lett*. 404:118-124.

**Table S3. Yeast Two hybrid Vectors**

| Plasmid Name            | Internal ID | Backbone | Cloning Sites    | Fusion Proteins | Source        |
|-------------------------|-------------|----------|------------------|-----------------|---------------|
| pGADT7                  | WISP03-38   |          |                  | N, GAL4 AD      | BD Bioscience |
| pGADT7.TSG101.WT        | WISP03-186  | pGADT7   | NcoI, BamHI      | N, GAL4 AD      | [1]           |
| pGADT7.TSG101.M95A      | WISP03-240  | pGADT7   | NcoI, BamHI      | N, GAL4 AD      | [1]           |
| pGADT7.TSG101.ΔPTAP     | WISP04-128  | pGADT7   | EcoRI, BamHI     | N, GAL4 AD      | HeLa cDNA     |
| pGADT7.TSG101.1-145     | WISP04-308  | pGADT7   | EcoRI, BamHI     | N, GAL4 AD      | [2]           |
| pGADT7.TSG101.146-311   | WISP04-310  | pGADT7   | EcoRI, BamHI     | N, GAL4 AD      | [2]           |
| pGADT7.TSG101.312-390   | WISP04-312  | pGADT7   | EcoRI, BamHI     | N, GAL4 AD      | [2]           |
| pGADT7.TSG101.231-329   | WISP07-33   | pGADT7   | EcoRI, BamHI     | N, GAL4 AD      | HeLa cDNA     |
| pGADT7.TSG101.146-235   | WISP07-34   | pGADT7   | EcoRI, BamHI     | N, GAL4 AD      | HeLa cDNA     |
| pGADT7.TSG101.164-235   | WISP07-35   | pGADT7   | EcoRI, BamHI     | N, GAL4 AD      | HeLa cDNA     |
| pGADT7.TSG101.182-235   | WISP07-36   | pGADT7   | EcoRI, BamHI     | N, GAL4 AD      | HeLa cDNA     |
| pGADT7.TSG101.200-235   | WISP07-37   | pGADT7   | EcoRI, BamHI     | N, GAL4 AD      | HeLa cDNA     |
| pGADT7.TSG101.218-235   | WISP07-38   | pGADT7   | EcoRI, BamHI     | N, GAL4 AD      | HeLa cDNA     |
| pGADT7.TSG101.149-151A  | WISP07-39   | pGADT7   | EcoRI, BamHI     | N, GAL4 AD      | HeLa cDNA     |
| pGADT7.TSG101.152-154A  | WISP07-40   | pGADT7   | EcoRI, BamHI     | N, GAL4 AD      | HeLa cDNA     |
| pGADT7.TSG101.155-157A  | WISP07-41   | pGADT7   | EcoRI, BamHI     | N, GAL4 AD      | HeLa cDNA     |
| pGADT7.TSG101.158-160A  | WISP07-42   | pGADT7   | EcoRI, BamHI     | N, GAL4 AD      | HeLa cDNA     |
| pGADT7.TSG101.161-163A  | WISP07-43   | pGADT7   | EcoRI, BamHI     | N, GAL4 AD      | HeLa cDNA     |
| pGADT7.ROCK1            | WISP03-289  | pGADT7   | NdeI, XmaI       | N, GAL4 AD      | [3]           |
| pGADT7.ALIX.WT          | WISP03-238  | pGADT7   | NdeI, BamHI      | N, GAL4 AD      | [1]           |
| pGADT7.ALIX.1-868       | WISP03-333  | pGADT7   | NdeI, BamHI      | N, GAL4 AD      | BC020066 [4]  |
| pGADT7.ALIX.1-716       | WISP03-334  | pGADT7   | NdeI, BamHI      | N, GAL4 AD      | BC020066 [4]  |
| pGADT7.ALIX.1-628       | WISP03-335  | pGADT7   | NdeI, BamHI      | N, GAL4 AD      | BC020066 [4]  |
| pGADT7.ALIX.1-473       | WISP03-336  | pGADT7   | NdeI, BamHI      | N, GAL4 AD      | BC020066 [4]  |
| pGADT7.ALIX.1-297       | WISP03-337  | pGADT7   | NdeI, BamHI      | N, GAL4 AD      | BC020066 [4]  |
| pGADT7.ALIX.1-167       | WISP03-338  | pGADT7   | NdeI, BamHI      | N, GAL4 AD      | BC020066 [4]  |
| pGADT7.ALIX.717-868     | WISP07-44   | pGADT7   | EcoRI, BamHI     | N, GAL4 AD      | BC020066 [4]  |
| pGADT7.ALIX.751-868     | WISP07-45   | pGADT7   | EcoRI, BamHI     | N, GAL4 AD      | BC020066 [4]  |
| pGADT7.ALIX.781-868     | WISP07-46   | pGADT7   | EcoRI, BamHI     | N, GAL4 AD      | BC020066 [4]  |
| pGADT7.ALIX.811-868     | WISP07-47   | pGADT7   | EcoRI, BamHI     | N, GAL4 AD      | BC020066 [4]  |
| pGADT7.ALIX.841-868     | WISP07-48   | pGADT7   | EcoRI, BamHI     | N, GAL4 AD      | BC020066 [4]  |
| pGADT7.CEP55.WT         | WISP04-288  | pGADT7   | EcoRI, BamHI     | N, GAL4 AD      | BC008947 [4]  |
| pGADT7.CEP55.19-407     | WISP07-49   | pGADT7   | EcoRI, BamHI     | N, GAL4 AD      | BC008947 [4]  |
| pGADT7.CEP55.19-385     | WISP07-50   | pGADT7   | EcoRI, BamHI     | N, GAL4 AD      | BC008947 [4]  |
| pGADT7.CEP55.157-236    | WISP07-51   | pGADT7   | EcoRI, BamHI     | N, GAL4 AD      | BC008947 [4]  |
| pGADT7.CEP55.359-464    | WISP07-52   | pGADT7   | EcoRI, BamHI     | N, GAL4 AD      | BC008947 [4]  |
| pGADT7.CEP55.408-464    | WISP07-53   | pGADT7   | EcoRI, BamHI     | N, GAL4 AD      | BC008947 [4]  |
| pGBKT7                  | WISP03-39   |          |                  | N, GAL4 DNA-BD  | BD Bioscience |
| pGBKT7.TSG101.WT        | WISP03-192  | pGBKT7   | NcoI, BamHI      | N, GAL4 DNA-BD  | [1]           |
| pGBKT7.TSG101.M95A      | WISP03-219  | pGBKT7   | NcoI, BamHI      | N, GAL4 DNA-BD  | [1]           |
| pGBKT7.TSG101.DPTAP     | WISP04-129  | pGBKT7   | EcoRI, BamHI     | N, GAL4 DNA-BD  | HeLa cDNA     |
| pGBKT7.TSG101.1-145     | WISP04-307  | pGBKT7   | EcoRI, BamHI     | N, GAL4 DNA-BD  | [2]           |
| pGBKT7.TSG101.146-311   | WISP04-309  | pGBKT7   | EcoRI, BamHI     | N, GAL4 DNA-BD  | [2]           |
| pGBKT7.TSG101.312-390   | WISP04-311  | pGBKT7   | EcoRI, BamHI     | N, GAL4 DNA-BD  | [2]           |
| pGBKT7.IQGAP1.1463-1547 | WISP04-29   | pGBKT7   | NdeI, SalI/ XhoI | N, GAL4 DNA-BD  | KIAA0051 [5]  |
| pGBKT7.CEP55.WT         | WISP04-289  | pGBKT7   | EcoRI, BamHI     | N, GAL4 DNA-BD  | BC008947 [4]  |
| pGBKT7.CEP55.19-407     | WISP07-54   | pGBKT7   | EcoRI, BamHI     | N, GAL4 DNA-BD  | BC008947 [4]  |
| pGBKT7.CEP55.19-385     | WISP07-55   | pGBKT7   | EcoRI, BamHI     | N, GAL4 DNA-BD  | BC008947 [4]  |
| pGBKT7.CEP55.157-236    | WISP07-56   | pGBKT7   | EcoRI, BamHI     | N, GAL4 DNA-BD  | BC008947 [4]  |
| pGBKT7.CEP55.359-464    | WISP07-57   | pGBKT7   | EcoRI, BamHI     | N, GAL4 DNA-BD  | BC008947 [4]  |
| pGBKT7.CEP55.408-464    | WISP07-58   | pGBKT7   | EcoRI, BamHI     | N, GAL4 DNA-BD  | BC008947 [4]  |

[1] von Schwedler UK, Stuchell M, Muller B, Ward DM, Chung HY, Morita E, Wang HE, Davis T, He GP, Cimbora DM, Scott A, Krausslich HG, Kaplan J, Morham SG, Sundquist WI. (2003) The protein network of HIV budding. *Cell*. 114:701-713.

[2] Langelier C, von Schwedler UK, Fisher RD, De Domenico I, White PL, Hill CP, Kaplan J, Ward D, Sundquist WI. (2006) Human ESCRT-II complex and its role in human immunodeficiency virus type 1 release. *J Virol*. 80:9465-9480.

[3] Ishizaki T, Naito M, Fujisawa K, Maekawa M, Watanabe N, Saito Y, Narumiya S. (1997) p160ROCK, a Rho-associated coiled-coil forming protein kinase, works downstream of Rho and induces focal adhesions. *FEBS Lett*. 404:118-124.

[4] EST clone number from ATCC.

[5] EST clone number from KAZUSA DNA research institute.

***Table S4. Antibodies***

| <b>Name</b>       | <b>Host</b> | <b>Clone #</b> | <b>Dilution Factor</b> | <b>Conjugation</b> | <b>Experiment</b> | <b>Source</b>                |
|-------------------|-------------|----------------|------------------------|--------------------|-------------------|------------------------------|
| Myc               | mouse       | 9E10           | 1:3000                 | none               | WB                | Covance                      |
| Myc               | goat        | ab9132         | 1:1000                 | none               | WB                | Abcam                        |
| FLAG              | mouse       | M2             | 1:5000                 | none               | WB                | Sigma                        |
| FLAG              | rabbit      | F7425          | 1:1000                 | none               | ICC               | Sigma                        |
| IQGAP1            | mouse       | VIC1           | 1:1000                 | none               | WB                | MBL                          |
| HIV CA            | rabbit      |                | 1:3000                 | none               | WB                | Original                     |
| HIV MA            | rabbit      |                | 1:3000                 | none               | WB                | Gift from Didier Trono       |
| TSG101            | mouse       | 4A10           | 1:1000                 | none               | WB                | GeneTex                      |
| ALIX              | rabbit      |                | 1:1000                 | none               | WB                | [1]                          |
| ALIX              | rabbit      |                | 1:100                  | none               | ICC               | [1]                          |
| VPS4A             | rabbit      |                | 1:1000                 | none               | ICC               | [2]                          |
| $\alpha$ -tubulin | mouse       | DM1A           | 1:5000                 | none               | WB                | Sigma                        |
| $\alpha$ -tubulin | mouse       | DM1A           | 1:1000                 | none               | ICC               | Sigma                        |
| $\gamma$ -tubulin | mouse       | GTU-88         | 1:1000                 | none               | ICC               | Sigma                        |
| rabbit IgG        | donkey      | A-21206        | 1:1000                 | Alexa 488          | ICC               | Invitrogen/ Molecular Probes |
| mouse IgG         | goat        | A-11032        | 1:1000                 | Alexa 594          | ICC               | Invitrogen/ Molecular Probes |

WB: Western Blotting, ICC: Immunocytochemistry

[1] Fisher RD, Chung HY, Zhai Q, Robinson H, Sundquist WI, Hill CP. (2007) Structural and biochemical studies of ALIX/AIP1 and its role in retrovirus budding. *Cell*. 128: 841-852

[2] von Schwedler UK, Stuchell M, Müller B, Ward DM, Chung HY, Morita E, Wang HE, Davis T, He GP, Cimbara DM, Scott A, Krausslich HG, Kaplan J, Morham SG, Sundquist WI. (2003) The protein network of HIV budding. *Cell*. 114:701-713.

**SUPPLEMENTAL FIGURE CAPTIONS****Fig. S1. CD2AP Co-precipitates with ESCRT-I and ALIX.**

(A) OSF-CD2AP co-precipitates Myc-ALIX. OSF-CD2AP or empty vector controls were tested for co-precipitation with overexpressed Myc-ALIX. Western blots show: 1) Myc-ALIX levels in soluble lysates (middle panel, Lysate, IB: anti-Myc), 2) OSF-CD2AP bound to the StrepTactin matrix (lower panel, IP:Strep, IB:anti-FLAG), and 3) Co-precipitated Myc-ALIX (upper panel, IP:Strep, IB:anti-Myc). In this experiment, and in those shown in Figs. 1B, 2B (right) and 2C (right), 293T cells were seeded ( $3 \times 10^6$  cells/55 cm<sup>2</sup> dish) and co-transfected with 3  $\mu$ g of each relevant expression plasmid (polyethylenimine 25,000 KDa; Polysciences, Warrington, PA) as described (Durocher et al., 2002). Cells were harvested 48h post-transfection by incubation in 300  $\mu$ l lysis buffer (LB: 50mM Tris (pH 7.4), 150mM NaCl) supplemented with proteinase inhibitor cocktail (Sigma) and 1% Triton X-100. Lysates were clarified by centrifugation (18,000 x g, 10 min, 4<sup>o</sup>), and incubated with StrepTactin Sepharose (40  $\mu$ l slurry, IBA GmbH, Gottingen Germany, 2h). The matrix was washed 4X in wash buffer (WB: 20 mM Tris (pH 7.4), 150 mM NaCl) supplemented with 0.1% Triton X100, and bound proteins were detected by western blotting. A list of the antibodies used in western blots is provided in Table S4.

(B) OSF-CD2AP co-precipitates the entire ESCRT-I complex. Western blots show: 1) ESCRT-I protein levels in soluble lysates (middle panel, Lysate, IB:anti-Myc), 2) OSF-CD2AP bound to the StrepTactin matrix (lower panel, IP:Strep, IB:anti-FLAG), and ESCRT-I proteins co-precipitated onto the matrix (upper panel, IP:Strep, IB:anti-Myc). Note that Myc-tagged versions of all four ESCRT-I subunits were co-expressed in these experiments. Samples in lanes 1 were co-transfected with an empty expression vector (negative control) and samples in lanes 2 were co-transfected with an OSF-CD2AP expression vector.



**Fig. S2. CEP55 Co-precipitations with ESCRT-I and ALIX.**

(A) OSF-CEP55 co-precipitates endogenous TSG101 and ALIX. Western blots show: Panels 2 and 4: Endogenous TSG101 and ALIX protein levels in soluble lysates (Lysate, IB:anti-TSG101 or anti-ALIX), Panel 5: OSF-CEP55 protein bound to the StrepTactin matrix (IP:Strep, IB:anti-FLAG). Panels 1 and 3: TSG101 or ALIX protein co-precipitated onto the matrix (IP:Strep, IB:anti-TSG101 or anti-ALIX). Samples in lanes 1 were transfected with an empty expression vector (negative control) and samples in lanes 2 were transfected with an OSF-CEP55 expression vector. The ALIX protein frequently appears as a doublet in Western blots (e.g., see Figs. 6 and S2A). The upper band corresponds to the full length ALIX protein, and the lower band is therefore presumably a degradation product.

(B) OSF-CEP55 co-precipitates the entire ESCRT-I complex. Western blots show: Middle panel: ESCRT-I protein levels in soluble lysates (Lysate, IB:anti-Myc), Lower panel: OSF-CEP55 protein bound to the StrepTactin matrix (IP:Strep, IB:anti-FLAG), and Upper Panel: ESCRT-I protein co-precipitated onto the matrix (IP: Strep, IB:anti-Myc). Note that Myc-tagged versions of all four ESCRT-I subunits were co-expressed in these experiments. Samples in lanes 1 were co-transfected with an empty expression vector (negative control) and samples in lanes 2 were co-transfected with an OSF-CEP55 expression vector.

**Fig. S3. Yeast Two Hybrid Analyses of CEP55 Dimerization.**

Yeast two hybrid mapping of the elements required for CEP55 dimerization. CEP55-AD fusions or control AD constructs (Empty) were co-expressed together with CEP55-DBD fusions or control DBD constructs (Empty) and tested for positive yeast two hybrid interactions (left panel) or co-transformation (right panel, control). CEP55 constructs are summarized schematically in Figure 2A. This experiment shows that full length CEP55-AD and CEP55-DBD constructs

produce a positive two hybrid interaction and that this interaction maps to CEP55 residues 19-385.

**Fig. S4. CEP55 Is Not Required for HIV-1 Release and Infectivity.**

**(A)** A TSG101 construct lacking CEP55 binding activity rescues HIV-1 release and infectivity from cells depleted of endogenous TSG101. In all cases,  $5 \times 10^5$  293T cells/well (6 well plates) were transfected with 1  $\mu$ g R9 proviral HIV-1 expression plasmid and depleted of endogenous TSG101 (Garrus et al., 2001). The figure shows viral titers (left) and virion release (upper right) in the absence of siRNA-resistant TSG101 expression (lanes 1, negative control), or upon expression of: wild type TSG101 (lanes 2, WT TSG101, positive control), a TSG101 mutant lacking CEP55 binding activity (lane 3, TSG101<sub>154-164A</sub>), or a TSG101 mutant lacking PTAP binding activity (lanes 4, TSG101<sub>M95A</sub>, negative control). Virus release (upper right, Virus) was assayed by western blot detection of virion-associated MA and CA proteins. Lower right panels show cell-associated TSG101 (bottom) and viral Gag and proteolytic processing products (middle, protein labels at right). HIV-1 infections were initiated by transfection of the proviral HIV-1 R9 construct, with cell- and virion-associated Gag proteins detected by western blotting and viral titers measured using single-cycle MAGIC assays as described (Garrus et al., 2001).

**(B)** An ALIX construct lacking CEP55 binding activity rescues release and infectivity of HIV-1 <sub>$\Delta$ PTAP</sub>. All 293T cells expressed the ALIX-dependent HIV-1 <sub>$\Delta$ PTAP</sub> virus (Fisher et al., 2007). HIV-1 infectivity (left) and release (right) were assayed in the absence of ALIX overexpression (lanes 1, Empty, negative control), upon overexpression of wild type ALIX (lanes 2, WT ALIX, positive control) or upon overexpression of a mutant ALIX construct that lacked CEP55 binding activity (lanes 3, ALIX<sub>800-802A</sub>). Other panels are the same as in part A. Note that these experiments were also repeated in HeLa cells with the same results (not shown).

**Fig. S5. Immunofluorescence Localization of Endogenous ALIX at Flemming Bodies and Centrosomes.**

Immunofluorescence and DIC images showing that  $\gamma$ -Tubulin (green) and endogenous ALIX (red) co-localize at the midbodies of dividing HeLa cells (upper row, arrowheads) and the centrosomes of non-dividing HeLa cells (lower row, arrowheads).

**Fig. S6. CEP55 Is Required for Flemming Body Localization of TSG101/ESCRT-I and ALIX.**

Double-labeled immunofluorescence and DIC images showing that siRNA depletion of CEP55 blocks midbody localization of GFP-TSG101/ESCRT-I (**A**) and GFP-ALIX (**B**) whereas siRNA depletion of TSG101 does not block midbody localization of FLAG-CEP55 (**C**). Similarly, ALIX depletion does not block midbody localization of FLAG-CEP55 (**D**) or GFP-TSG101 (**E**).

**(A)** Lack of GFP-TSG101/ESCRT-I (0.5  $\mu$ g GFP-TSG101, VPS28, VPS37B, and MVB12A DNA) localization at the midbodies of dividing HeLa cells depleted of CEP55. This experiment, and those in parts (B)-(E) followed the time course:  $t=0$ , cells seeded at  $4 \times 10^5$  cells/well;  $t=24$  h, protein expression vector transfected (0.5  $\mu$ g DNA, Lipofectamine, Invitrogen);  $t=48$  h, cells trypsin treated and reseeded with 4-16 fold dilution onto 12 well glass plates;  $t=72$  h, siRNA transfection (Lipofectamin RNAi MAX);  $t=78$  h, media changed + siRNA transfected;  $t=96$  h, siRNA transfected,  $t=102$ h, media changed,  $t=120$ h, cells fixed, stained, and imaged. Microtubule staining (red,  $\alpha$ -Tubulin) is shown here is shown in columns 1, 3, and 5 for reference, and expanded views of the midbodies are shown in column 5.

**(B)** Lack of GFP-ALIX (0.5  $\mu$ g DNA) localization to the midbodies of dividing cells depleted of CEP55.

(C) FLAG-CEP55 (0.5  $\mu$ g DNA) localization at the midbodies of dividing cells depleted of TSG101.

(D) FLAG-CEP55 (0.5  $\mu$ g DNA) localization at the midbodies of dividing cells depleted of ALIX.

(E) GFP-TSG101/ESCRT-I (0.125  $\mu$ g each of GFP-TSG101, VPS28, VPS37B, and MVB12A DNA) localization at the midbodies of dividing cells depleted of ALIX.

**Fig. S7. CEP55 Depletion Quantitatively Blocks ALIX Localization to Midbodies.**

Transduced HeLa cells expressing FLAG-ALIX were depleted of CEP55 or treated with a control siRNA, and cells undergoing cytokinesis were scored for the presence or absence of FLAG-ALIX at the midbody. FLAG-ALIX expressing HeLa cells were created using a MuLV-based retroviral vector, (pMIH, derived from pMX-IRES-GFP (Onishi et al., 1996)), that expressed FLAG-ALIX and also expressed the murine H2KK protein from an IRES sequence. Vector stocks were created by co-transfecting pMIH-FLAG-ALIX (6  $\mu$ g) with pGag-pol (4  $\mu$ g, (Onishi et al., 1996)), and pMD.G envelope (2  $\mu$ g, (Onishi et al., 1996)) into 293T cells ( $3 \times 10^6$  cells/10cm plate) using Polyethyleneimine (PEI). 36 h post-transfection, vector-containing supernatants were harvested and filtered (0.22  $\mu$ m, Millipore). HeLa cells ( $2 \times 10^6$  cells/10 cm plate) were then incubated for 12 h with 5 ml vector-containing supernatants together with polybrene (8 $\mu$ g/ml) for 12h. After an additional 24 h, HeLa cells were trypsinized and transduced cells were bound to magnetic beads conjugated with anti-H2KK antibody and magnetically purified (Miltenyi Biotec, Germany). >95% of the purified cells expressed H2KK as measured by FACS using FITC labeled anti-H2KK antibody. The resulting FLAG-ALIX expressing cells were then replated ( $5 \times 10^4$  cells/well in a 6 well plate), transfected every 12 h (3x) with an siRNA against CEP55 or a control siRNA (10  $\mu$ M, Lipofectamin RNAi Max, Invitrogen). 24 h

after the third siRNA transfection, cells were fixed, stained with anti-FLAG and anti- $\alpha$ -Tubulin antibodies, and scored for FLAG-ALIX localization. Measurements were performed in triplicate (n=20 midbodies from 500-1000 cells each) and error bars denote standard deviations.

**Fig. S8. Endogenous VPS4A Localizes to Very Thin Midbodies.**

(A) Double-labeled immunofluorescence images showing localization of endogenous VPS4A at the Flemming body within a very thin midbody (yellow arrowheads), but not at Flemming bodies within thicker midbodies (white arrowheads). Microtubules were also stained ( $\alpha$ -Tubulin, red). These images are stacked confocal z slices.

(B) Quantification of the midbody localization of endogenous VPS4 in cells depleted of TSG101, ALIX, CEP55, or treated with an irrelevant siRNA (Control). ~20 midbodies were counted in each case.

**Fig. S9. Time Lapse Movies Showing Cytokinesis Defects in Cells Depleted of Endogenous ALIX.**

(A) Phase contrast, time lapse images of a field of HeLa cells treated with a control siRNA.

(B) Time lapse images of a field of ALIX-depleted HeLa cells. Note that the cells exhibit both early cytokinesis defects (i.e., rapid re-coalescence into multiploid cells following furrow ingression, yellow arrows) and late cytokinesis defects (i.e., arrested midbody formation with late re-coalescence, blue arrow).

(C) Time lapse image of an isolated multinuclear ALIX-depleted HeLa cell that begins to divide, forms a nearly complete cleavage furrow (t=140-160 min), and then rapidly re-coalesces into a single cell (t=180-220 min).

(D) Time lapse image of an isolated ALIX-depleted HeLa cell showing a late cytokinesis defect (blue arrow). Note that the midbody forms, and remains stably arrested for >9 h (t=45-865 min) before the mother and daughter re-coalesce into a single cell at ~870 min).

**Fig. S10. ALIX Localizes to Class E Compartments Induced by Expression of Dominant Negative VPS4<sub>K173Q</sub>.**

(A) Immunofluorescence images showing localization of FLAG-ALIX (red) together with wild type VPS4A-GFP (green, top row) or the VPS4A<sub>K173Q</sub>-GFP mutant (bottom row), which induces formation of enlarged, aberrant endosomes (“class E compartments”), and traps the ESCRT machinery on their surface. Merged images are shown in column 3, and DIC images are shown in column 4. These data are in good agreement with similar analyses by Krausslich and colleagues (Welsch et al., 2006).

(B) Quantification of the percentage of cells in which VPS4-GFP proteins (light bars) and FLAG-ALIX (dark bars) exhibited class E localization. Left: co-expression with wild type VPS4-GFP, Right: co-expression with VPS4A<sub>K173Q</sub>-GFP. Five fields of ~100 cells each were counted, and error bars denote standard deviations.

**A**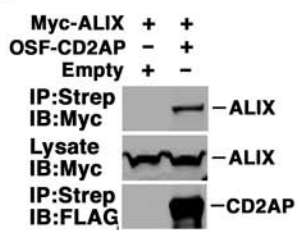**B**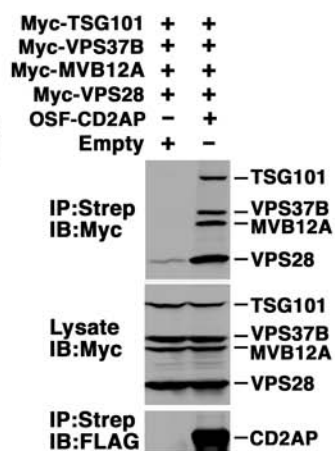

**A**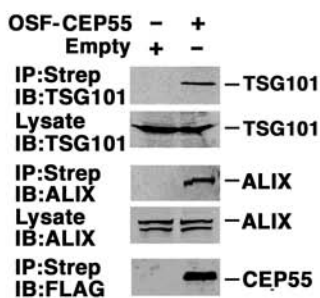**B**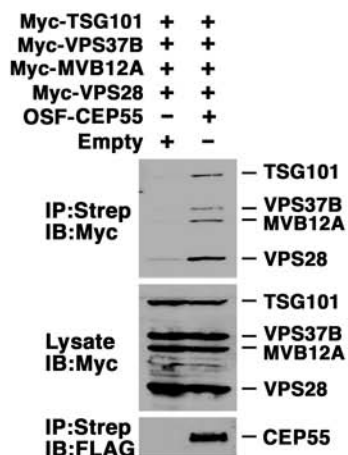



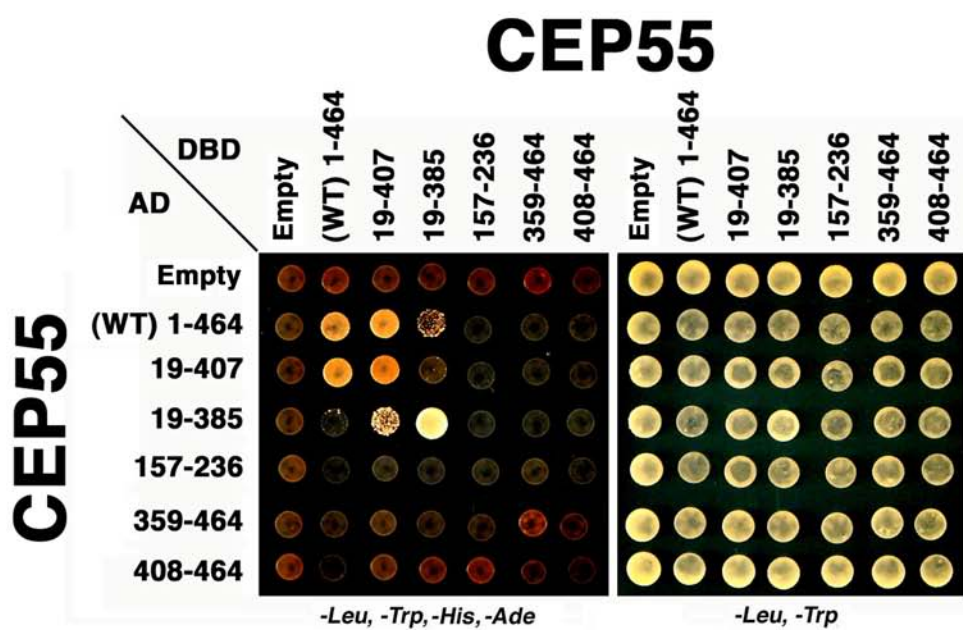

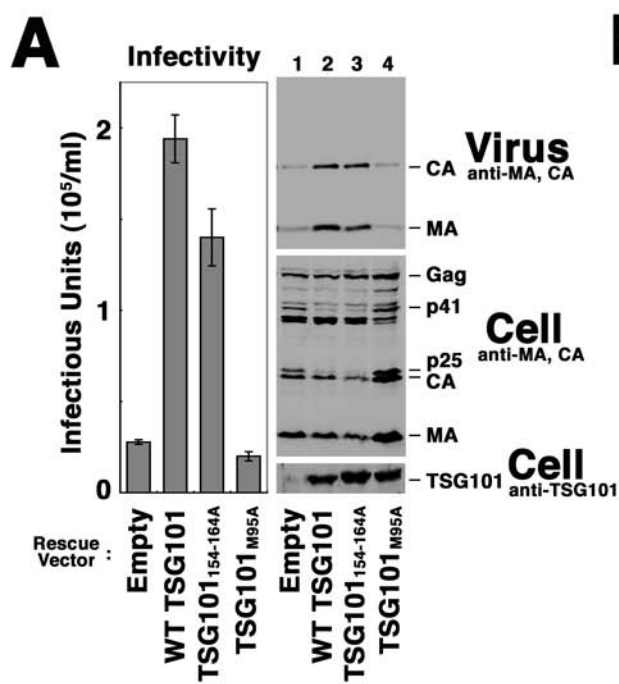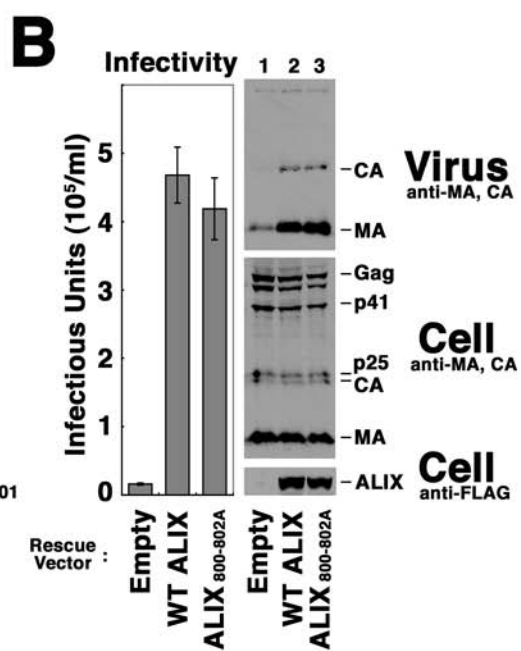

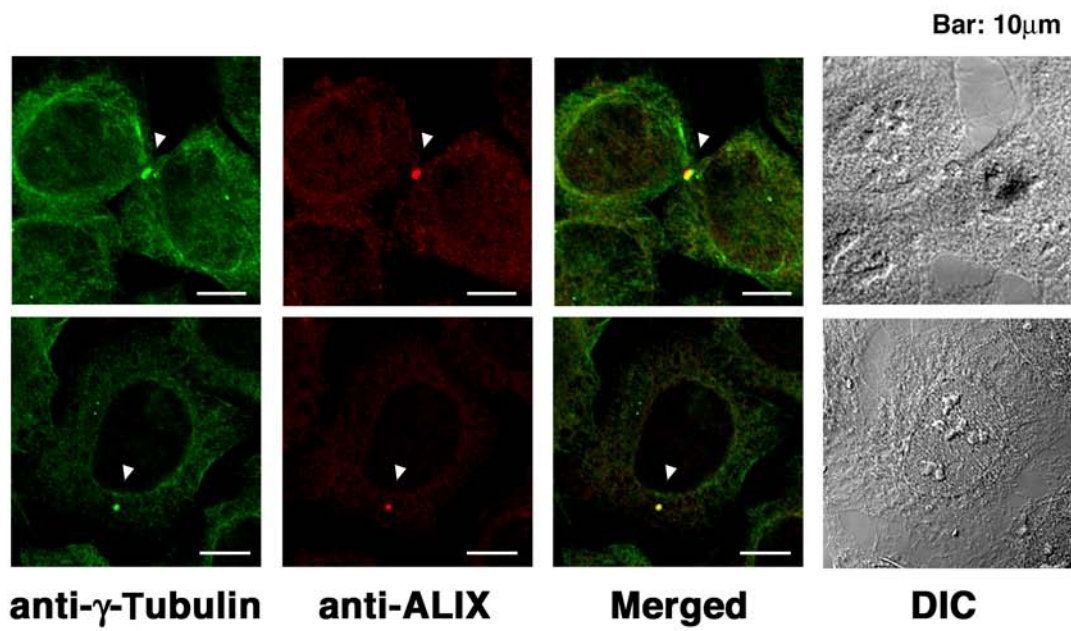

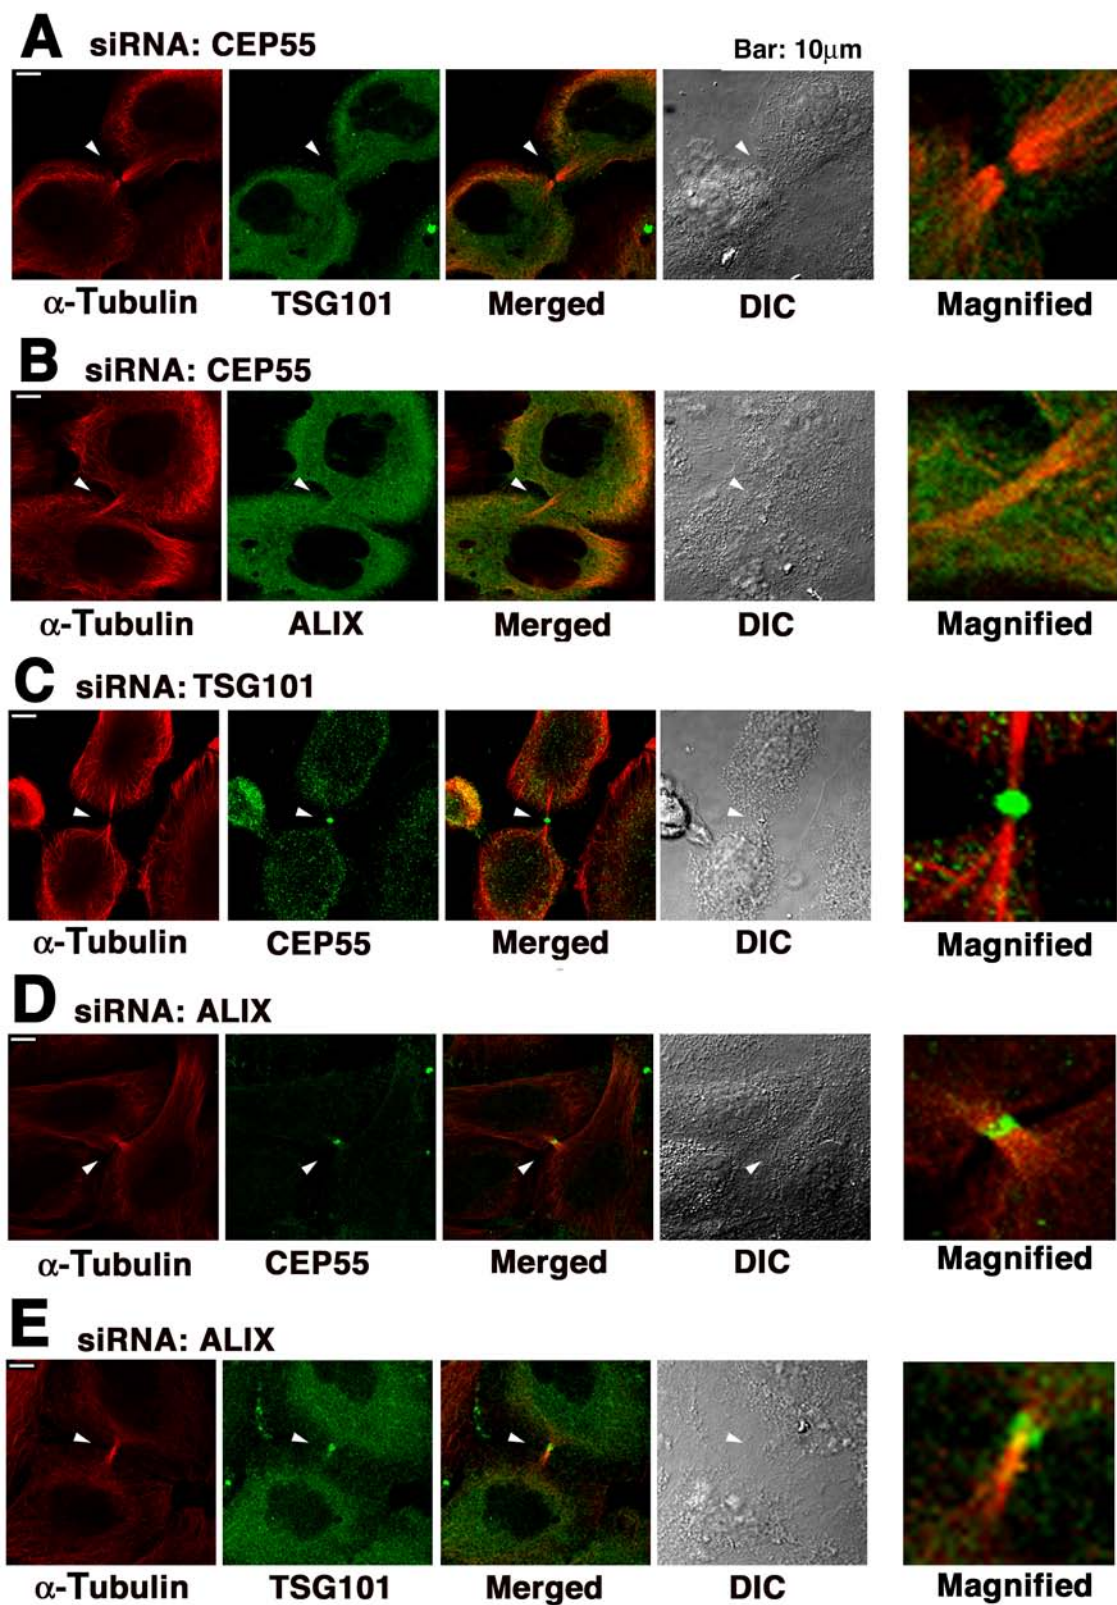

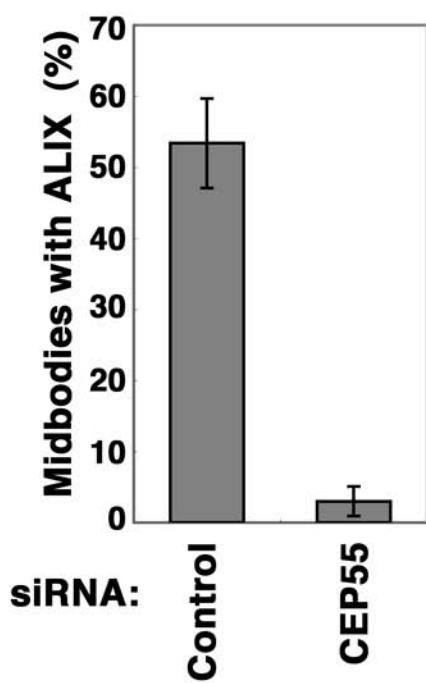

**A**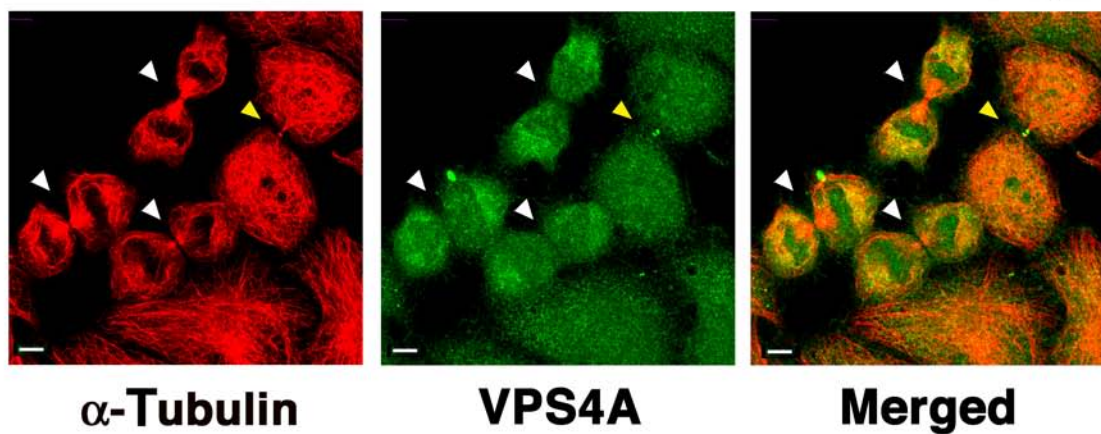**B**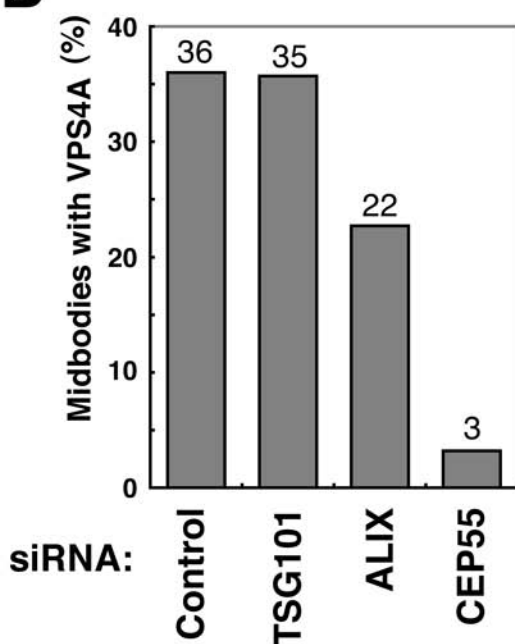

**A**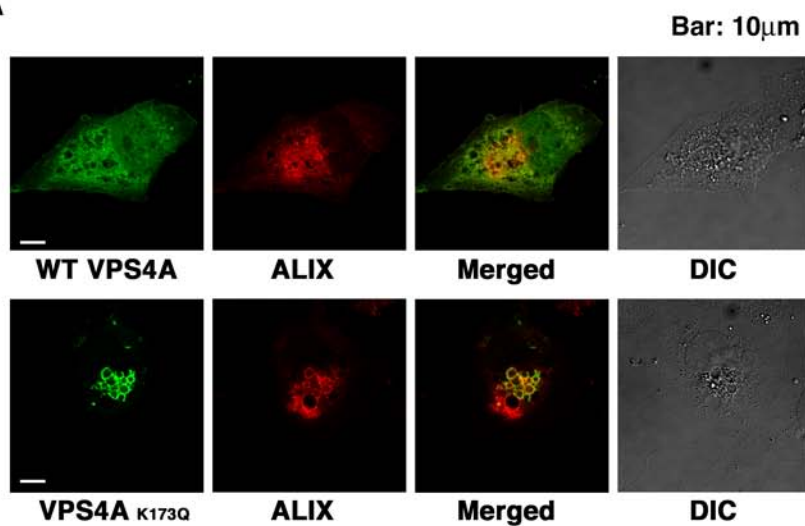**B**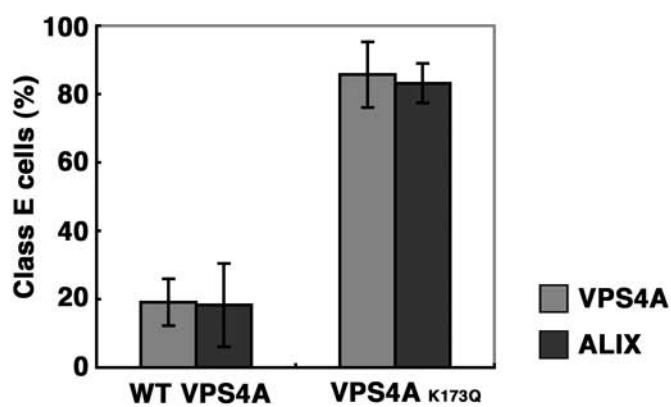

Supplement: 7601850s1.pdf [file 7601850s1.pdf]
